# Supplementary material for: Diversity and Distribution of <em>β</em>-lactamase Genes Circulating in Indian Isolates of Multi-drug Resistant <em>Klebsiella pneumoniae</em>
Source: Preprints.org preprint supplement (doi:10.20944/preprints202301.0350.v1), 2023-01-19
Supplement: Supplementary file 1 [file supplementary]

## Sheet: Table S1
		Isolate (Strain)
Drug Class	Drugs	ST1 (DGL18)	M2 (SBS1)	M6 (SBS3)	M10 (SBS4)	M17B (SBS5)	M34A (DGL1)	M39 (SBS11)	M40 (DGL2)	DJ (SBS12)	M47 (DGL5)	M48 (DGL6)	M49 (DGL7)	M50 (DGL8)	M51 (DGL9)	M52 (DGL10)	M53 (DGL11)	M54 (DGL12)	M55 (DGL13)	M56 (DGL14)	M57 (DGL15)	M58 (DGL16)	M59 (DGL17)
Aminoglycosides	Gentamicin	R	R	R	R	R	S	R	S	R	R	S	R	R	R	R	R	R	R	R	R	R	R
	Amikacin	R	R	R	R	R	I	S	S	R	R	R	R	R	R	I	R	R	R	R	R	R	R
Fluoroquinolones	Ciprofloxacin	R	R	R	R	R	S	S	R	R	R	R	R	R	R	R	R	R	R	R	R	R	R
	Nalidixic acid	R	R	R	S	R	S	S	S	R	R	R	R	R	R	R	R	R	R	R	R	R	R
	Levofloxacin	R	R	R	S	R	S	S	R	R	R	R	R	R	R	R	R	R	R	R	R	R	R
Glycylcycline	Tigecycline	S	S	S	S	S	S	S	S	R	I	R	R	R	R	R	R	R	R	R	R	I	R
Antipseudomonal penicillins + β-lactamase inhibitors	Ticarcillin-clavulanic acid	R	R	R	R	R	R	R	R	R	R	R	R	R	R	R	R	R	R	R	R	R	R
	Piperacillin-tazobactam	R	R	R	R	R	R	R	R	R	R	R	R	R	R	R	R	R	R	R	R	R	R
Carbapenems	Ertapenem	R	R	R	S	R	S	S	S	R	R	R	R	R	R	R	R	R	R	R	R	R	R
	Imipenem	R	R	R	S	R	S	S	S	R	I	I	R	I	R	R	R	R	R	R	I	R	R
	Meropenem	R	R	R	S	R	S	S	S	R	R	R	R	R	S	R	R	R	R	R	R	R	R
	Doripenem	R	R	R	S	R	S	S	S	R	R	R	R	R	R	R	R	R	R	R	R	R	R
Non-extended spectrum cephalosporins; 1st and 2nd generation cephalosporins	Cefuroxime	R	R	R	S	R	S	S	S	R	R	R	R	R	R	R	R	R	R	R	R	R	R
Extended spectrum cephalosporins; 3rd and 4th generation cephalosporins	Cefotaxime or Ceftriaxone	R	R	R	R	R	R	R	R	R	R	R	R	R	R	R	R	R	R	R	R	R	R
	Ceftazidime	R	R	R	S	R	S	S	S	R	R	R	R	R	R	R	R	R	R	R	R	R	R
	Cefepime	R	R	R	R	R	R	R	R	R	R	R	R	R	R	R	R	R	R	R	R	R	R
Monobactams	Aztreonam	S	R	R	R	R	R	R	R	R	R	R	R	R	R	R	R	R	R	R	R	R	R
Penicillins	Ampicillin	R	R	R	R	R	R	R	R	R	R	R	R	R	R	R	R	R	R	R	R	R	R
Penicillins+ β-lactamase inhibitors	Amoxicillin-clavulanic acid	R	S	R	R	R	S	S	S	R	R	R	R	R	R	R	R	R	R	R	R	R	R
	Ampicillin-sulbactam	R	R	R	R	R	S	S	S	R	R	R	R	R	R	R	R	R	R	R	R	R	R
Phenicols	Chloramphenicol	R	R	R	S	R	S	S	S	R	R	R	R	R	R	R	R	R	R	R	R	R	R
Polymyxins	Colistin	S	S	S	S	S	S	S	S	R	R	R	S	R	S	S	S	S	S	S	S	S	S
Cephalosporins + β-lactamase inhibitors	Cefoparazone/sulbatam	R	R	R	R	R	R	R	R	R	R	R	R	R	R	R	R	R	R	R	R	R	R
Sulfanilamides	Trimethoprim/Sulfamethoxazole	R	R	R	S	R	S	S	S	R	R	S	R	R	R	R	R	R	R	R	R	S	R
		XDR	XDR	XDR	MDR	XDR	MDR	MDR	MDR	PDR	PDR	XDR	XDR	PDR	XDR	XDR	XDR	XDR	XDR	XDR	XDR	XDR	XDR
	MIC value (ug/ml)
PDR Isolates	Colistin	Tigecycline
M47 (DGL5)	>=16	2
M50 (DGL8)	>=16	4
DJ (SBS12)	>=16	4
Definition
MDR	Atleast 1 agent in 3 or more categories
XDR	Atleast 1 agent in all but 2 or fewer antimicrobials categories.
PDR	All agents in all categories
Reference-	Magiorakos, A.-P.; Srinivasan, A.; Carey, R.B.; Carmeli, Y.; Falagas, M.E.; Giske, C.G.; Harbarth, S.; Hindler, J.F.; Kahlmeter, G.; Olsson-Liljequist, B.; et al. Multidrug-Resistant, Extensively Drug-Resistant and Pandrug-Resistant Bacteria: An International Expert Proposal for Interim Standard Definitions for Acquired Resistance. Clin. Microbiol. Infect. 2012, 18, 268–281, doi:10.1111/j.1469-06…
